# Supplementary material
Source: Springer Nature journal article supplement (https://www.springermedizin.de/resource/supplementary/12984_2009_208_MOESM6_ESM.pdf/9605554)

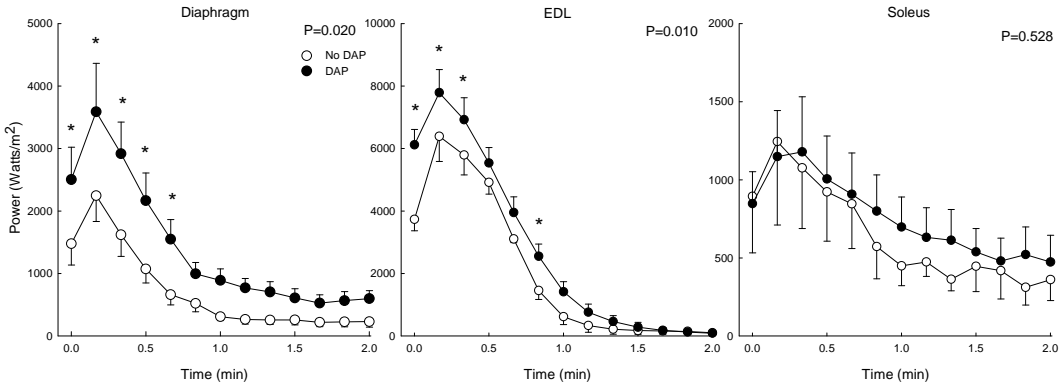

Supplement: MOESM6 [file 9605554]
